1 Original Article

2 Title: The association between loneliness during the COVID-19 pandemic and  
3 psychological distress

4

5 Yusuke Konno<sup>1,2</sup>, Masako Nagata<sup>3</sup>, Ayako Hino<sup>4</sup>, Seiichiro Tateishi<sup>5</sup>, Mayumi Tsuji<sup>6</sup>,

6 Akira Ogami<sup>7</sup>, Reiji Yoshimura<sup>2</sup>, Shinya Matsuda<sup>8</sup>, Yoshihisa Fujino<sup>1</sup> for the

7 CORoNaWork Project

8

9 **Author contributions:** Y.F. was the chairperson of the study group. Y.K. conceived the  
10 research questions. All the authors designed the research protocol and developed the  
11 questionnaire. Y.K. conducted the statistical analysis with Y.F.. Y.K. drafted the initial  
12 manuscript. All the authors revised and approved the final manuscript.

13

14 **Authors' affiliations:**

15 <sup>1</sup>Department of Environmental Epidemiology, Institute of Industrial Ecological  
16 Sciences, University of Occupational and Environmental Health, Japan, Kitakyushu,  
17 Japan

18 <sup>2</sup> Department of Psychiatry, University of Occupational and Environmental Health,

19 Japan, Kitakyushu, Japan

20 <sup>3</sup>Department of Occupational Health Practice and Management, Institute of Industrial  
21 Ecological Sciences, University of Occupational and Environmental Health, Japan,  
22 Kitakyushu, Japan

23 <sup>4</sup>Department of Mental Health, Institute of Industrial Ecological Sciences, University of  
24 Occupational and Environmental Health, Japan, Kitakyushu, Japan

25 <sup>5</sup>Department of Occupational Medicine, School of Medicine, University of  
26 Occupational and Environmental Health, Japan, Kitakyushu, Japan

27 <sup>6</sup>Department of Environmental Health, School of Medicine, University of Occupational  
28 and Environmental Health, Japan, Kitakyushu, Japan

29 <sup>7</sup>Department of Work Systems and Health, Institute of Industrial Ecological Sciences,  
30 University of Occupational and Environmental Health, Japan, Kitakyushu, Japan

31 <sup>8</sup>Department of Preventive Medicine and Community Health, School of Medicine,  
32 University of Occupational and Environmental Health, Japan, Kitakyushu, Japan

33

34 **Corresponding author:** Yoshihisa Fujino<sup>1</sup>, M.D., M.P.H., Ph.D.

35 Department of Environmental Epidemiology, Institute of Industrial Ecological Sciences,  
36 University of Occupational and Environmental Health, Japan

37 1-1, Iseigaoka, Yahatanishiku, Kitakyushu, 807-8555, Japan

38 Tel: +81-93-691-7401

39 Email: zenq@med.uoeh-u.ac.jp

40

41

42 **Abstract**

43 The purpose of this study was to examine the association between loneliness and  
44 psychological distress during the COVID-19 pandemic in Japan. We conducted a  
45 cross-sectional, online study from 22 to 26 December 2020. A total of 27,036 participants,  
46 all employed at the time of the survey, were included in the analysis. Participants were  
47 asked if they felt loneliness in a single-item question. The Kessler 6 (K6) was used to  
48 assess psychological distress defined as K6 scores of 5 or higher, and 13 or higher. The  
49 odds ratios (ORs) of psychological distress associated with loneliness were estimated  
50 using a multilevel logistic model nested in the prefecture of residence, with adjustment  
51 for age, sex, marital status, equivalent income, educational level, smoking, alcohol  
52 consumption, job type, number of workplace employees, and cumulative incidence rate  
53 of COVID-19 in the prefecture. Communication with friends, acquaintances, and family  
54 was strongly associated with psychological distress, so we adjusted for these factors and  
55 eating meals alone. Results showed a significant association between loneliness and  
56 psychological distress (OR = 36.62, 95%CI = 32.95-40.69). Lack of friends to talk to,  
57 lack of acquaintances to ask for help, and lack of people to communicate with through  
58 social networking sites were all strongly associated with psychological distress, as were  
59 family time and solitary eating. Even after adjusting for these factors, loneliness was

60 still strongly associated with psychological distress (OR = 29.36, 95%CI = 26.44-32.98).

61 The association between loneliness during the COVID-19 pandemic and psychological

62 distress indicates the need for intervention.

63

64

65        **1. Introduction**

66        The outbreak of the new coronavirus infection (COVID-19) caused by SARS-CoV-2 was  
67        first reported in Wuhan, China, in December 2019, and it has since spread around the  
68        world. The World Health Organization (WHO) declared a public health emergency on 30  
69        January 2020, and on 11 March 2020, declared it a pandemic. In Japan, the first case was  
70        reported on 16 January 2020, and the disease was designated as a designated infectious  
71        disease on 1 February 2020. As of March 2021, the disease continues to spread around the  
72        world. Japan is no exception, and since the first case was reported, the outbreak has  
73        spread, with a cumulative total of 324,846 confirmed cases in the year from 16 January  
74        2020 to 16 January 2021.<sup>1</sup> In addition to its infectiousness, COVID-19 was found to be  
75        highly contagious, with high severity of illness and a high mortality rate in severely ill  
76        patients, leading to measures aimed at preventing COVID-19 in many countries around  
77        the world.<sup>2</sup>

78        In its "Coronavirus disease (COVID-19) advice for the public" to combat  
79        COVID-19, WHO advised to: "Maintain at least a 1-meter distance between yourself and  
80        others to reduce your risk of infection when they cough, sneeze or speak. Maintain an  
81        even greater distance between yourself and others when indoors." It also recommends

82 avoiding the 3Cs, i.e. spaces that are closed, crowded, or involve close contact, using the  
83 phrase: "Avoid the 3Cs".<sup>3</sup>

84 These COVID-19 measures were also applied in Japan, resulting in a  
85 transformation of lifestyles and making people more isolated. The Ministry of Health,  
86 Labour and Welfare (MHLW) has announced a "new lifestyle" for the new coronavirus,  
87 recommending that people avoid contact with other people as much as possible, and if  
88 they do make contact, it should be for short periods of time; they should avoid talking,  
89 and maintain as much distance from others as possible. People are advised to refrain from  
90 going out unnecessarily and to shop online as much as possible.<sup>4</sup> Living the kind of life  
91 recommended for COVID-19 prevention limits communication and makes it easier to  
92 socially withdraw.

93 The work environment is no exception with respect to COVID-19 measures  
94 resulting in greater isolation. "Examples of 'new lifestyle' practices in anticipation of the  
95 new coronavirus" recommend telework and online meetings, rota working, and staggered  
96 commuting.<sup>4</sup> As a result, employees work alone at home, and meetings are held on the  
97 web. They no longer have dinners with their workmates, but rather eat and drink alone.  
98 No more crowded commuting, no more being with others in enclosed spaces such as  
99 offices or conference rooms, no more conversations without wearing a mask when eating

100 or drinking. In parallel, opportunities for both public and private communication have  
101 decreased, and people's lifestyle has become more solitary than before the COVID-19  
102 pandemic.

103 It has been reported that during the COVID-19 pandemic, people lead more  
104 isolated lives and that feelings of psychological distress have increased due to COVID-19  
105 prevention measures.<sup>7,8</sup> Psychological distress causes physical and mental health  
106 problems. Physically, psychological distress can trigger the onset and exacerbation of  
107 cardiovascular diseases such as hypertension, arrhythmia, ischemic heart disease and  
108 heart failure, and chronic stress can lead to overeating and lack of exercise, which in turn  
109 leads to obesity, placing an additional burden on the cardiovascular system.<sup>9</sup> Furthermore,  
110 excessive psychological distress is a risk factor for mental disorders including  
111 depression.<sup>10</sup>

112 The longer the COVID-19 pandemic continues, the more psychological distress  
113 is expected to increase, and the more physical and mental disorders caused by  
114 psychological distress are expected to increase; therefore, we believe that psychological  
115 distress alleviation measures are necessary. The causes of psychological distress resulting  
116 from the COVID-19 pandemic are thought to be diverse, but if one of them is isolated  
117 living and the sense of loneliness that arises from it, then countermeasures are necessary.



118 The purpose of this study is to examine the association between loneliness and  
119 psychological distress under COVID-19 conditions, and to help improve health.

120

121

122        2. Methods

123        *2.1. Study design and participants*

124        This cross-sectional study was conducted on the Internet from 22 to 26 December 2020.

125        The details of the protocol have already been reported.<sup>11</sup> In brief, data were collected

126        from people who were in employment at the time of the survey, selected by prefecture,

127        occupation, and gender. A total of 33,302 people participated in the survey. After

128        excluding clearly untruthful responses, data from 27,036 participants were included in the

129        analysis.

130        *2.2. Assessment of loneliness*

131        In this survey, one question was used to determine whether the participants felt loneliness

132        or not. To the question: "During the last 30 days, how frequently have you felt

133        loneliness?", the subjects answered by selecting one option from: never, a little,

134        sometimes, usually, always. If the subject answered always, usually, or sometimes,

135        loneliness was considered to be present.

136

137        *2.3. Assessment of psychological distress*

138        Kessler 6 (K6) was used to assess psychological distress.<sup>12</sup> The validity of the Japanese

139        version of K6 has been confirmed.<sup>5,6</sup> In this study, the cutoff for mild psychological

140 distress was a K6 score of 5 or higher, and for severe psychological distress, a score of 13  
141 or higher.

142

#### 143 *2.4. Other covariates*

144 The following survey items were considered confounding factors: age, sex, marital status,  
145 equivalent income, educational level, smoking, alcohol consumption, job type, number of  
146 employees at the workplace and cumulative incidence rate of COVID-19 in the prefecture.

147 The survey also asked questions such as: “Do you have friends or neighbors with whom  
148 you can easily engage in small talk or daily conversation? “; “Do you have someone you  
149 can ask for help?” and “Do you have a partner with whom you can communicate closely  
150 using SNSs?” The participants responded “Yes” or “No” to these questions. For the

151 question: “Time spent with family having a meal or at home”, participants answered:

152 more than 2 hours, more than 1 hour, more than 30 minutes, less than 30 minutes, almost

153 never. For the question: “How often do you eat all meals of the day alone?” they

154 answered: 6–7 days a week, 4–5 days a week, 2–3 days a week, less than 1 day a week,

155 hardly ever.

156           In addition, the cumulative incidence of COVID-19 from the time of the survey  
157 to one month before in the prefecture of residence was used as a community-level  
158 variable. Information was collected from the websites of public institutions.

159

### 160 *2.5. Statistical analysis*

161 Odds ratios (ORs) for loneliness and psychological distress were estimated with a logistic  
162 model. Psychological distress was defined as mild psychological distress with a K6  
163 score of 5 or higher, and severe psychological distress with a K6 score of 13 or higher. In  
164 the multivariate model, we adjusted for age, sex, marital status, equivalent income,  
165 educational level, smoking, alcohol consumption, job type, number of employees in the  
166 workplace, and cumulative incidence rate of COVID-19 in the prefecture. In another  
167 model, we added having friends or neighbors with whom to easily make small talk or  
168 have daily conversations, having someone who can be asked for a little help, and having a  
169 close friend to communicate with on social networking sites. The rate of COVID-19  
170 incidence by prefecture was used as a prefecture-level variable.

171           A p-value of less than 0.05 was considered statistically significant. Stata (Stata  
172 Statistical Software: Release 16. College Station, TX: StataCorp LLC.) was used for  
173 analysis.



175 **3. Results**

176 The characteristics of the database are shown in table 1. Of the 27,036 participants, 2,750  
177 (10%) felt loneliness. Of those who reported feeling loneliness, 93.6% had mild  
178 psychological distress and 58.5% had severe psychological distress. In contrast, only  
179 33.9% of the group who did not feel loneliness had mild psychological distress and 3.5%  
180 had severe psychological distress. The percentage of participants who answered "yes" to  
181 the questions: "Do you have friends or neighbors with whom you can easily engage in  
182 small talk or daily conversation?", "Do you have someone you can ask for help?",  
183 and "Do you have a partner with whom you can communicate closely using SNSs?" was  
184 lower in the loneliness group in all cases. Those who spent less time with their family  
185 during meals and gatherings were more likely to feel loneliness, while those who ate all  
186 their meals alone were more likely to feel loneliness. The percentage of participants who  
187 felt loneliness was higher among women, the unmarried, and those on low incomes. No  
188 differences emerged in relation to job type or number of employees in the workplace.

189 Table 2 shows the odds ratios (ORs) of loneliness and severe psychological  
190 distress estimated by the logistic model. In the age-adjusted model, there was a  
191 significant association between loneliness and psychological distress (OR = 37.74,  
192 95%CI = 34.04-41.85). This result was also found in the multivariate analysis (OR =

193 36.62, 95%CI = 32.95-40.69). Lack of friends to talk to, lack of acquaintances to ask for  
194 favors, and lack of people to communicate with through social networking sites were all  
195 strongly associated with psychological distress. Family time and solitary eating were  
196 both associated with psychological distress. Even after adjusting for these factors,  
197 loneliness was still strongly associated with psychological distress (OR = 29.36, 95%CI  
198 = 26.44-32.98).  
199

#### 200 **4. Discussion**

201 In this study, 10% of all participants felt loneliness, and this loneliness was strongly  
202 associated with psychological distress. Other studies have reported that people's  
203 psychological distress increased during the COVID-19 pandemic.<sup>13</sup> Communication  
204 with friends, acquaintances, and family was also strongly associated with psychological  
205 distress; we therefore adjusted for spending time with friends, acquaintances, and family,  
206 but loneliness was still strongly associated with psychological distress. Loneliness is  
207 generally defined as the discrepancy between a person's desired social relationships and  
208 their actual social relationships.<sup>14</sup> And loneliness is considered to be different from social  
209 isolation, although there is overlap between the two.<sup>14</sup> In this study, loneliness was  
210 assessed by the subjective question: "Have you ever felt loneliness?" By contrast,  
211 communication with friends, acquaintances, and family, which was used as an adjustment  
212 factor, was assessed using objective questions, as was social isolation. The results of this  
213 study showed that loneliness and social isolation overlap, but only partially, and the  
214 non-overlapping parts are considered to be subjective experiences. We believe that this  
215 subjective experience is associated with psychological distress and is a factor that should  
216 be addressed.



217           One of the reasons for the loneliness highlighted here is considered to be the  
218   particular lifestyle that has arisen due to the COVID-19 pandemic. This lifestyle requires  
219   a different way of living, complying with "Avoid the 3Cs"<sup>15,16</sup> to prevent infection, but as  
220   a result, communication has decreased. This has led to a sense of loneliness, which in  
221   turn is thought to be linked to psychological distress. As of February 2021, there is no  
222   prospect of COVID-19 eradication, and people will need to continue their new lifestyles  
223   to prevent infection. Therefore, the incidence of psychological distress is expected to  
224   remain high for some time. As severe psychological distress conditions can be  
225   physically and mentally disabling, interventions for loneliness are needed if  
226   psychological distress under COVID-19 pandemic conditions persists.

227           As an intervention for loneliness, the usefulness of online communication such as  
228   social media has been advocated.<sup>17</sup> Online communication tools, such as social  
229   networking sites, can be a valuable countermeasure against loneliness during the  
230   pandemic, and are also useful in terms of infection prevention.<sup>18</sup> In a randomized  
231   controlled trial conducted during the COVID-19 pandemic, an empathy-focused program  
232   of telephone calls significantly improved loneliness.<sup>19</sup> Thus, various types of online  
233   communication, such as communication via the web and telephone calls, and using social  
234   media, may be useful as interventions for loneliness during the COVID-19 pandemic.

235           However, it has also been pointed out that continual use of social media and other  
236 forms of online communication in situations of loneliness may be harmful. One risk is  
237 increased psychological distress caused by excessive media consumption. Being  
238 inundated with inaccurate information and excessive media consumption during the  
239 COVID-19 pandemic may lead to deteriorating mental health.<sup>20</sup> WHO has cautioned that  
240 with the current growing use of social media and the internet, not only useful but also  
241 inaccurate or harmful information about COVID-19 can spread quickly, leading to  
242 confusion, health problems and mistrust of health institutions.<sup>21-23</sup>

243           Another risk is the issue of addiction. Loneliness is a risk factor for substance or  
244 behavioral addictions, including the Internet.<sup>24,25</sup> In addition, addiction to the Internet  
245 increases one's loneliness, and the increased loneliness worsens the addiction, thus  
246 creating a vicious cycle.<sup>26</sup>

247           Thus, there is a risk that online communication, even when used with the intention  
248 to reduce psychological distress, may conversely exacerbate or cause such distress, or  
249 lead to addictive behaviors. Online communication is useful as a countermeasure to  
250 loneliness, but in some cases, it may have harmful consequences, and therefore it should  
251 be used with caution.

252

253 *4.1. Limitations of the study*

254 There are several limitations to this study. First, because it was conducted online using  
255 the Internet, the generalizability of the results is uncertain, but we attempted to minimize  
256 participant bias by sampling by occupation, region, and prefecture based on the incidence  
257 of infection. Second, the accuracy of the reported incidence of loneliness may be  
258 questioned because loneliness was evaluated only by the question: "Have you ever felt  
259 loneliness?" In studies that evaluated accuracy, the binary evaluation of living alone had  
260 the lowest accuracy.<sup>26</sup> However, we feel that the question asked in this study is  
261 appropriate, as it briefly asks about participants' subjective experiences.  
262 Third, because this is a cross-sectional study, the temporal relationship between  
263 loneliness and psychological distress is unknown.

264

265 **5. Conclusion**

266 We found that 10% of the participants felt loneliness living under conditions of the  
267 COVID-19 pandemic. Loneliness was associated with psychological distress, which we  
268 believe requires intervention. Online communication is considered to be an effective  
269 intervention in loneliness, but at the same time, it is important to take into account risks,  
270 such as addiction.

271

272

273 **Acknowledgments**

274 This study was supported by a research fund from the University of Occupational and  
275 Environmental Health, Japan; General Incorporated Foundation (Anshin Zaidan); The  
276 Development of Educational Materials on Mental Health Measures for Managers at  
277 Small-sized Enterprises; Health, Labour and Welfare Sciences Research Grants;  
278 Comprehensive Research for Women's Healthcare (H30-josei-ippan-002); Research for  
279 the Establishment of an Occupational Health System in Times of Disaster  
280 (H30-roudou-ippan-007), and scholarship donations from Chugai Pharmaceutical Co.,  
281 Ltd.

282

283 Present members of the Collaborative Online Research on the  
284 Novel-coronavirus and Work (CORoNaWork) Project are: Dr. Yoshihisa Fujino (current  
285 chairperson), Dr. Akira Ogami, Dr. Arisa Harada, Dr. Ayako Hino, Dr. Chimed-Ochir  
286 Odgerel , Dr. Hajime Ando, Dr. Hisashi Eguchi, Dr. Kazunori Ikegami, Dr. Keiji  
287 Muramatsu, Dr. Koji Mori, Dr. Kyoko Kitagawa, Dr. Masako Nagata, Dr. Mayumi  
288 Tsuji, Dr. Rie Tanaka, Dr. Ryutaro Matsugaki, Dr. Seiishiro Tateishi, Dr. Shinya  
289 Matsuda, Dr. Tomohiro Ishimaru, Dr. Tomohisa Nagata, Dr. Yosuke Mafune, and Ms.  
290 Ning Liu, in alphabetical order. All of the members are affiliated with the University of

291 Occupational and Environmental Health, Japan.

292

293 **Disclosure**

294 *Approval of the research protocol:* This study was approved by the Ethics

295 Committee of the University of Occupational and Environmental Health, Japan (R2-079).

296 *Registry and the Registration No. of the study/trial :* N/A. *Animal Studies :* N/A. *Conflict of Interest :*

297 Yusuke Konno, Masako Nagata, Ayako Hino, Seiichiro Tateishi, Mayumi Tsuji, Akira Ogami,

298 Shinya Matsuda, Yoshihisa Fujino declare no Conflict of Interests for this article. Reiji Yoshimura

299 has received speaker's honoraria from Eli Lilly, Janssen, Dainippon Sumitomo, Otsuka, Meiji, Pfizer

300 and Shionogi.

301

- 302 1. Outbreaks in Japan.  
303 <https://www.mhlw.go.jp/stf/covid-19/kokunainohasseijoukyou.html>
- 304 2. Weiss P, Murdoch DR. Clinical course and mortality risk of severe COVID-19. *Lancet*.  
305 2020;395(10229):1014-1015.
- 306 3. Advice for the public on COVID-19 – World Health Organization.  
307 <https://www.who.int/emergencies/diseases/novel-coronavirus-2019/advice-for-p>  
308 ublic
- 309 4. A practical example of a “new lifestyle” for COVID-19.  
310 [https://www.mhlw.go.jp/stf/seisakunitsuite/bunya/0000121431\\_newlifestyle.htm](https://www.mhlw.go.jp/stf/seisakunitsuite/bunya/0000121431_newlifestyle.htm)  
311 1
- 312 5. Qiu J, Shen B, Zhao M, Wang Z, Xie B, Xu Y. A nationwide survey of psychological  
313 distress among Chinese people in the COVID-19 epidemic: implications and policy  
314 recommendations. *Gen Psychiatr*. 2020;33(2):e100213.
- 315 6. Wang C, Pan R, Wan X, et al. Immediate Psychological Responses and Associated  
316 Factors during the Initial Stage of the 2019 Coronavirus Disease (COVID-19)  
317 Epidemic among the General Population in China. *Int J Environ Res Public Health*.  
318 2020;17(5). doi:10.3390/ijerph17051729
- 319 7. Rosengren A, Hawken S, Ounpuu S, et al. Association of psychosocial risk factors  
320 with risk of acute myocardial infarction in 11119 cases and 13648 controls from  
321 52 countries (the INTERHEART study): case-control study. *Lancet*.  
322 2004;364(9438):953-962.
- 323 8. Iso H, Date C, Yamamoto A, et al. Perceived mental stress and mortality from  
324 cardiovascular disease among Japanese men and women: the Japan Collaborative  
325 Cohort Study for Evaluation of Cancer Risk Sponsored by Monbusho (JACC Study).  
326 *Circulation*. 2002;106(10):1229-1236.
- 327 9. Slavich GM, Irwin MR. From stress to inflammation and major depressive disorder:  
328 a social signal transduction theory of depression. *Psychol Bull*.  
329 2014;140(3):774-815.
- 330 10. Fujino Y, Ishimaru T, Eguchi H, et al. Protocol for a nationwide

- 331 Internet-based health survey in workers during the COVID-19 pandemic in 2020.  
332 *bioRxiv*. Published online February 5, 2021. doi:10.1101/2021.02.02.21249309
- 333 11. Kessler RC, Andrews G, Colpe LJ, et al. Short screening scales to monitor  
334 population prevalences and trends in non-specific psychological distress.  
335 *Psychol Med*. 2002;32(6):959-976.
- 336 12. Furukawa TA, Kawakami N, Saitoh M, et al. The performance of the Japanese  
337 version of the K6 and K10 in the World Mental Health Survey Japan. *Int J Methods*  
338 *Psychiatr Res*. 2008;17(3):152-158.
- 339 13. Russell D, Peplau LA, Cutrona CE. The revised UCLA Loneliness Scale:  
340 concurrent and discriminant validity evidence. *J Pers Soc Psychol*.  
341 1980;39(3):472-480.
- 342 14. Wheeler L, Reis H, Nezlek J. Loneliness, social interaction, and sex roles.  
343 *J Pers Soc Psychol*. 1983;45(4):943-953.
- 344 15. Seepersad S. Coping with loneliness: adolescent online and offline behavior.  
345 *Cyberpsychol Behav*. 2004;7(1):35-39.
- 346 16. Pittman M. Creating, Consuming, and Connecting: Examining the Relationship  
347 Between Social Media Engagement and Loneliness. *The Journal of Social Media in*  
348 *Society*. 2015;4(1). Accessed January 29, 2021.  
349 <http://www.thejsms.org/tsmri/index.php/TSMRI/article/view/92>
- 350 17. Hajek A, König H-H. Social Isolation and Loneliness of Older Adults in Times  
351 of the COVID-19 Pandemic: Can Use of Online Social Media Sites and Video Chats  
352 Assist in Mitigating Social Isolation and Loneliness? *Gerontology*.  
353 2021;67(1):121-124.
- 354 18. Kahlon MK, Aksan N, Aubrey R, et al. Effect of Layperson-Delivered,  
355 Empathy-Focused Program of Telephone Calls on Loneliness, Depression, and Anxiety  
356 Among Adults During the COVID-19 Pandemic: A Randomized Clinical Trial. *JAMA*  
357 *Psychiatry*. Published online February 23, 2021.  
358 doi:10.1001/jamapsychiatry.2021.0113
- 359 19. Holmes EA, O' Connor RC, Perry VH, et al. Multidisciplinary research  
360 priorities for the COVID-19 pandemic: a call for action for mental health science.  
361 *Lancet Psychiatry*. 2020;7(6):547-560.



- 362 20. World Health Organization. Infodemic. World Health Organization.  
363 <https://www.who.int/health-topics/infodemic>
- 364 21. Hunt MG, Marx R, Lipson C, Young J. No More FOMO: Limiting Social Media  
365 Decreases Loneliness and Depression. *J Soc Clin Psychol*. 2018;37(10):751-768.
- 366 22. Moody EJ. Internet use and its relationship to loneliness. *Cyberpsychol Behav*.  
367 2001;4(3):393-401.
- 368 23. Savci M, Aysan F. Relationship between Impulsivity, Social Media Usage and  
369 Loneliness. *Kutahya*. 2016;5(2):106-115.
- 370 24. Bozoglan B, Demirer V, Sahin I. Loneliness, self-esteem, and life  
371 satisfaction as predictors of Internet addiction: a cross-sectional study among  
372 Turkish university students. *Scand J Psychol*. 2013;54(4):313-319.
- 373 25. Kim J, LaRose R, Peng W. Loneliness as the cause and the effect of problematic  
374 Internet use: the relationship between Internet use and psychological well-being.  
375 *Cyberpsychol Behav*. 2009;12(4):451-455.
- 376 26. Holt-Lunstad J, Smith TB, Bradley Layton J. Social Relationships and  
377 Mortality Risk: A Meta-analytic Review. *PLoS Med*. 2010;7(7):e1000316.
